# Supplementary material for: Genetic and clinical correlates of entosis in pancreatic ductal adenocarcinoma
Source: PubMed Central journal article supplement (PMC7452867; doi:10.1038/s41379-020-0549-5), 2020-04-29
Supplement: 41379_2020_549_MOESM1_ESM.pdf [file 41379_2020_549_MOESM1_ESM.pdf]

**Supplementary Information 1. TP53 Hot Spot Mutation in Entotic-CIC Positive PDAC**

| <i>TP53</i> mutation |             | Total | Entotic-CIC |          |            | P-Value |
|----------------------|-------------|-------|-------------|----------|------------|---------|
|                      |             |       | Positive    | Negative | % Positive |         |
| Hotspot              | R175H       | 39    | 4           | 35       | 10.3%      | 0.331   |
|                      | R248W/Q     | 28    | 6           | 22       | 21.4%      |         |
|                      | R273C/H/L/S | 30    | 3           | 27       | 10.0%      |         |
|                      | R282W       | 16    | 4           | 12       | 25.0%      |         |
| Truncating           |             | 135   | 20          | 115      | 14.8%      | 1.000   |
| Non-truncating       |             | 265   | 39          | 226      | 14.7%      |         |

P-value was calculated with Fisher's exact test, two-sided.
