# Supplementary material for: Genetic and clinical correlates of entosis in pancreatic ductal adenocarcinoma
Source: PubMed Central journal article supplement (PMC7452867; doi:10.1038/s41379-020-0549-5), 2020-04-29
Supplement: 41379_2020_549_MOESM2_ESM.pdf [file 41379_2020_549_MOESM2_ESM.pdf]

Primary

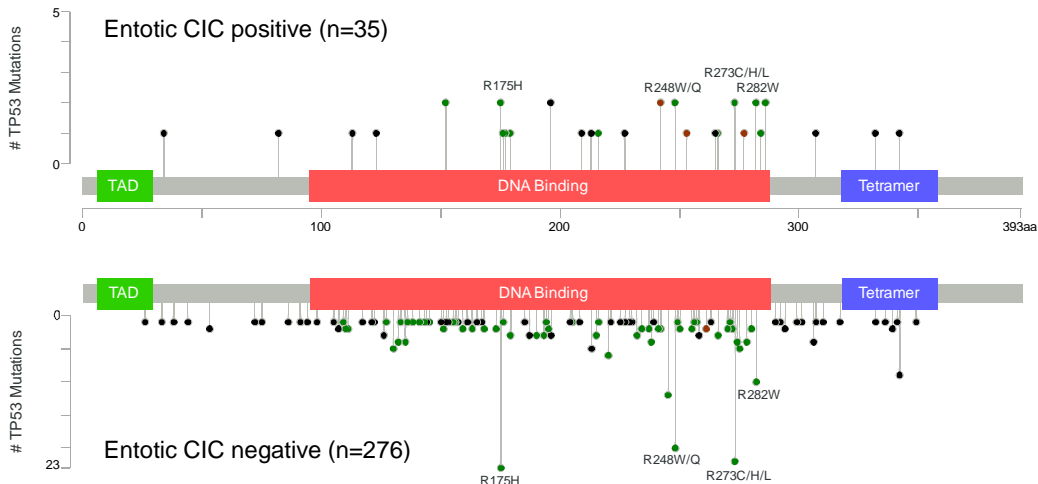

Metastasis

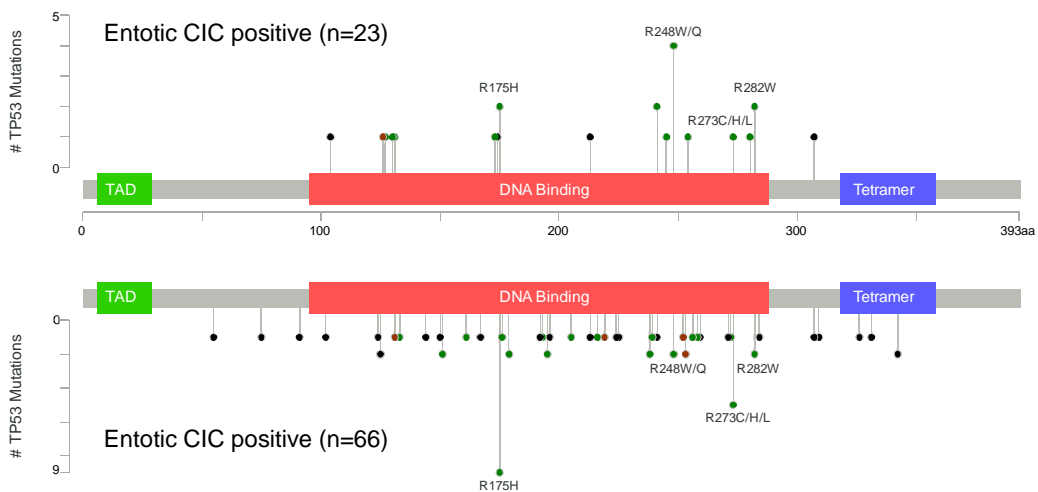

## Supplementary Information 2

Lollipop of TP53 in entotic CIC positive and negative PDACs for primary and metastasis.
