# Supplementary material for: Genetic and clinical correlates of entosis in pancreatic ductal adenocarcinoma
Source: PubMed Central journal article supplement (PMC7452867; doi:10.1038/s41379-020-0549-5), 2020-04-29
Supplement: 41379_2020_549_MOESM3_ESM.pdf [file 41379_2020_549_MOESM3_ESM.pdf]

### Supplementary Information 3. *KRAS* Hot Spot Mutation in Entotic-CIC Positive PDAC

| <i>KRAS</i> mutation |      | Total | Entotic-CIC |          |            | P-Value |
|----------------------|------|-------|-------------|----------|------------|---------|
|                      |      |       | Positive    | Negative | % Positive |         |
| Hotspot              | G12D | 213   | 28          | 185      | 13.1%      | 0.501   |
|                      | G12V | 166   | 27          | 139      | 16.3%      |         |
| Others               |      | 113   | 13          | 100      | 11.5%      |         |

P-value was calculated with Fisher's exact test, two-sided.
